# Supplementary material for: Bimekizumab, a Novel Humanized IgG1 Antibody That Neutralizes Both IL-17A and IL-17F
Source: PubMed Central journal article supplement (PMC7473305; doi:10.3389/fimmu.2020.01894), 2020-08-21
Supplement: Data_Sheet_1.pdf [file Data_Sheet_1.pdf]

## SUPPLEMENTARY MATERIAL

496.g1 light chain variable region

AIQLTQSPSSLSASVGDRVTITCRADESVTTLMH<sup>W</sup>YQQKPGKAPKLLIYLVS<sup>N</sup>RESGVPSR<sup>F</sup>SGS  
GSGTDFTLTISSLQPEDFATYYCQQTWSDPWTFGQGTKVEIK

496.g3 light chain variable region – 5 mutations are underlined

AIQLTQSPSSLSASVGDRVTITCRADESVRTLMHWYQQKPGKAPKLLIYLVS<sup>N</sup>SEIGVPDR<sup>F</sup>SGS  
GSGTDFRLTISSLQPEDFATYYCQQTWSDPWTFGQGTKVEIK

496.g1 / 496.g3 heavy chain variable region

EVQLVESGGGLVQPGGSLRLSCAASGFTFS<sup>D</sup>YNMAWVRQAPGKGLEWVATITYEGRNTYYRD  
SVKGRFTISRDNAKNSLYLQMNSLRAEDTAVYYCASPPQYYEGSIYRLWFAHWGQGTLVTVSS
